# Supplementary material for: Star-shaped and star-block polymers with a porphyrin core: from LCST–UCST thermoresponsive transition to tunable self-assembly behaviour and fluorescence performance
Source: Royal Society of Chemistry journal article supplement (doi:10.1039/c5ra21647h), 2016-01-01
Supplement: c5ra21647h1.pdf [file c5ra21647h1.pdf]

Electronic Supplementary Information for:

**Star-shaped and star-block polymers with porphyrin core: from  
LCST-UCST thermoresponsive transition to tunable self-  
assembly behaviour and fluorescence performance**

Weizhong Yuan\* and Xiangnan Chen

*School of Materials Science and Engineering, Key Laboratory of Advanced Civil Materials of  
Ministry of Education, Tongji University, 201804, People's Republic of China. Fax: +86 21  
69584723; Tel: +86 21 69580234; E-mail: yuanwz@tongji.edu.cn*

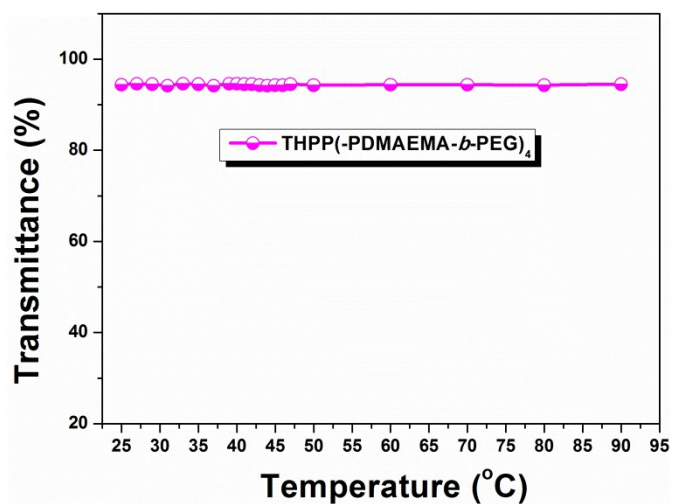

Fig. S1 Transmittance curve of THPP(-PDMAEMA-*b*-PEG)<sub>4</sub> from 25 °C to 90 °C.

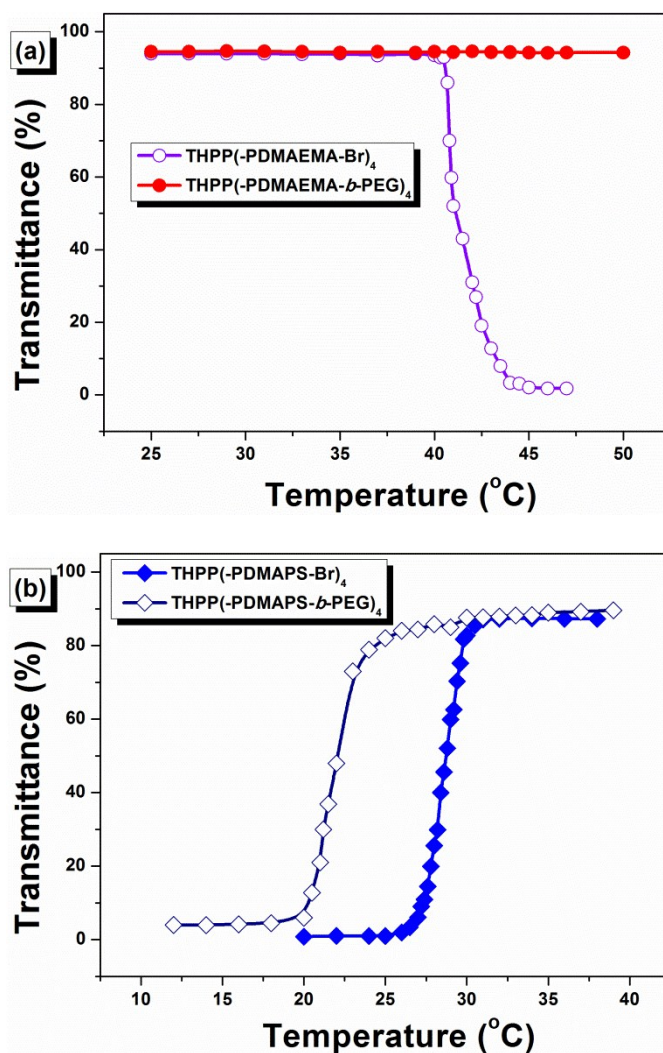

Fig. S2 Transmittance curves of (a) THPP(-PDMAEMA-Br)<sub>4</sub> and THPP(-PDMAEMA-*b*-PEG)<sub>4</sub>,  
(b) THPP(-PDMAPS-Br)<sub>4</sub> and THPP(-PDMAPS-*b*-PEG)<sub>4</sub> during cooling process.

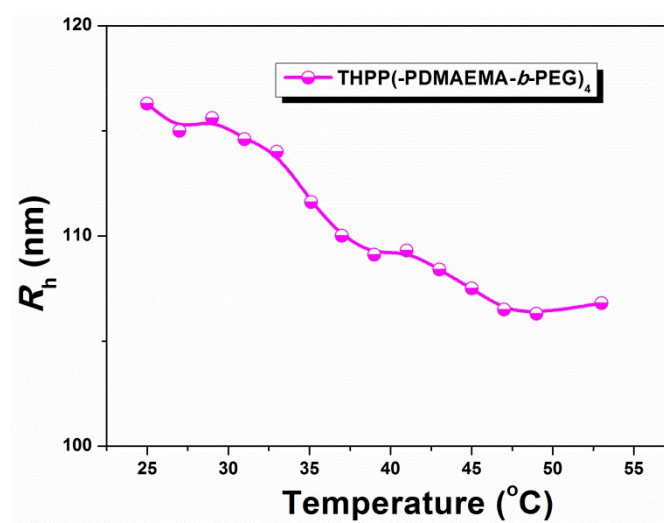

**Fig. S3** Temperature dependence of hydrodynamic radius ( $R_h$ ) for THPP(-PDMAEMA-*b*-PEG)<sub>4</sub>.
